# Supplementary material for: Theoretical perspectives on the structure, electronic, and optical properties of titanosilicates Li2M4[(TiO)Si4O12] (M = K+, Rb+)
Source: Royal Society of Chemistry journal article supplement (doi:10.1039/c7cp01946g), 2017-01-01
Supplement: c7cp01946g1.pdf [file c7cp01946g1.pdf]

## Electronic supplementary information for

### Theoretical perspectives on the structure, electronic, and optical properties of titanosilicates $\text{Li}_2\text{M}_4[(\text{TiO})\text{Si}_4\text{O}_{12}]$ ( $\text{M} = \text{K}^+, \text{Rb}^+$ )

Jinyu Hu,<sup>a,b</sup> Zuju Ma,<sup>a</sup> Rongjian Sa,<sup>a</sup> Yongfan Zhang,<sup>c</sup> and Kechen Wu<sup>a,\*</sup>

<sup>a</sup>State Key Laboratory of Structural Chemistry, Fujian Institute of Research on the Structure of Matter, Chinese Academy of Sciences, Fuzhou 350002, P.R. China

<sup>b</sup>University of Chinese Academy of Sciences, Beijing 100049, P.R. China

<sup>c</sup>College of Chemistry, Fuzhou University, Fuzhou 350002, P.R. China.

**Figure S1** Band gap values predicted for  $\text{Li}_2\text{K}_4[(\text{TiO})\text{Si}_4\text{O}_{12}]$  through variation of the parameter U.

**Table S1** Selected bond lengths (Si-O, and Ti-O), angles (O-Si-O, and O-Ti-O), and lattice constants of titanosilicates compared with available experimental values.

**Table S2** Comparisons of the calculated band gaps using different methods with the experimental values (eV).

**Figure S1** Band gap values predicted for  $\text{Li}_2\text{K}_4[(\text{TiO})\text{Si}_4\text{O}_{12}]$  through variation of the parameter  $U$ . The dashed black lines indicate the point at which the  $U$  tuning theoretically agrees well with the experimental band gap 4.11 eV.

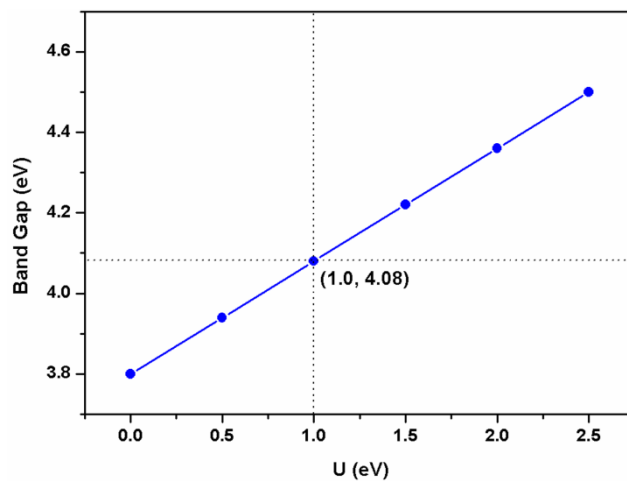

**Table S1** Selected bond lengths (Si-O, and Ti-O), angles (O-Si-O, and O-Ti-O), and lattice constants of titanosilicates obtained with PBE functional compared with available experimental values.

|                                  |          | Li <sub>2</sub> K <sub>4</sub> [(TiO)Si <sub>4</sub> O <sub>12</sub> ] |        | Li <sub>2</sub> Rb <sub>4</sub> [(TiO)Si <sub>4</sub> O <sub>12</sub> ] |        |
|----------------------------------|----------|------------------------------------------------------------------------|--------|-------------------------------------------------------------------------|--------|
|                                  |          | exp. <sup>1</sup>                                                      | cal.   | exp. <sup>1</sup>                                                       | cal.   |
| <i>a</i>                         | (Å)      | 11.33                                                                  | 11.48  | 11.50                                                                   | 11.65  |
| <i>c</i>                         | (Å)      | 5.00                                                                   | 5.08   | 5.14                                                                    | 5.20   |
| Si-O<br>(SiO <sub>4</sub> , Å)   | Si-O1    | 1.59                                                                   | 1.61   | 1.60                                                                    | 1.61   |
|                                  | Si-O2    | 1.60                                                                   | 1.62   | 1.61                                                                    | 1.63   |
|                                  | Si-O3    | 1.65                                                                   | 1.68   | 1.65                                                                    | 1.68   |
|                                  | Si-O4    | 1.66                                                                   | 1.69   | 1.67                                                                    | 1.68   |
| Ti-O<br>(TiO <sub>5</sub> , Å)   | Ti-O1    | 1.98                                                                   | 2.00   | 1.97                                                                    | 2.00   |
|                                  | Ti-O5    | 1.68                                                                   | 1.71   | 1.67                                                                    | 1.71   |
| O-Si-O<br>(SiO <sub>4</sub> , °) | O1-Si-O2 | 115.26                                                                 | 115.21 | 115.59                                                                  | 115.71 |
|                                  | O1-Si-O3 | 111.02                                                                 | 111.40 | 111.14                                                                  | 111.28 |
|                                  | O1-Si-O4 | 110.66                                                                 | 111.07 | 110.73                                                                  | 111.19 |
|                                  | O2-Si-O3 | 108.30                                                                 | 108.03 | 108.01                                                                  | 107.80 |
|                                  | O2-Si-O4 | 107.32                                                                 | 106.93 | 107.08                                                                  | 106.70 |
| O-Ti-O<br>(TiO <sub>5</sub> , °) | O3-Si-O4 | 103.56                                                                 | 103.45 | 103.50                                                                  | 103.33 |
|                                  | O1-Ti-O2 | 86.72                                                                  | 86.66  | 87.10                                                                   | 87.16  |
|                                  | O1-Ti-O5 | 103.84                                                                 | 103.96 | 103.00                                                                  | 102.85 |

**Table S2** Comparisons of the calculated band gaps using different methods with the experimental values (eV).

|                   | $\text{Li}_2\text{K}_4[(\text{TiO})\text{Si}_4\text{O}_{12}]$ | $\text{Li}_2\text{Rb}_4[(\text{TiO})\text{Si}_4\text{O}_{12}]$ |
|-------------------|---------------------------------------------------------------|----------------------------------------------------------------|
| Exp. <sup>1</sup> | 4.11                                                          | 4.13                                                           |
| PBE               | 3.80                                                          | 3.68                                                           |
| HSE03             | 5.49                                                          | /                                                              |
| HSE06             | 5.67                                                          | /                                                              |
| PBE+U (U=1eV)     | 4.08                                                          | 4.10                                                           |

1 T. L. Chao, W. J. Chang, S. H. Wen, Y. Q. Lin, B. C. Chang and K. H. Lii, *J. Am. Chem. Soc.*, 2016, **138**, 9061-9064.
